# Supplementary material for: Food Finding Test without Deprivation: A Sensorial Paradigm Sensitive to Sex, Genotype, and Isolation Shows Signatures of Derangements in Old Mice with Alzheimer’s Disease Pathology and Normal Aging
Source: MDPI journal article supplement (doi:10.3390/brainsci14030288), 2024-03-18
Supplement: s1 [file s1]

**Table S1.** Food finding test in 3xTg-AD and NTg mice under naturalistic and forced isolation.

| <b>Naturalistic Social Isolation [14] 12-month-old with overnight food deprivation</b>          |                    |   |       |                        |   |       |                           |   |       |
|-------------------------------------------------------------------------------------------------|--------------------|---|-------|------------------------|---|-------|---------------------------|---|-------|
|                                                                                                 | NTg Male<br>(n=24) |   |       | 3xTg-AD Male<br>(n=15) |   |       | 3xTg AD-ISO Male<br>(n=7) |   |       |
|                                                                                                 | Mean               | ± | SEM   | Mean                   | ± | SEM   | Mean                      | ± | SEM   |
| Food finding test                                                                               |                    |   |       |                        |   |       |                           |   |       |
| Lat of sniffing (s)                                                                             | 251                | ± | 63.8  | 135.7                  | ± | 16.2  | 85.1                      | ± | 14.5  |
| Lat of finding food (s)                                                                         | 424.2              | ± | 57.9  | 152.4                  | ± | 15.7  | 111.8                     | ± | 17.1  |
| Lat of eating (s)                                                                               | 912.4              | ± | 121   | 193                    | ± | 17.7  | 138.1                     | ± | 23.6  |
| <b>Forced Social Isolation (current work) – 16-month-old without overnight food deprivation</b> |                    |   |       |                        |   |       |                           |   |       |
|                                                                                                 | NTg Male<br>(n=6)  |   |       | NTg-ISO Male<br>(n=8)  |   |       | 3xTg-AD Male<br>(n=10)    |   |       |
|                                                                                                 | Mean               | ± | SEM   | Mean                   | ± | SEM   | Mean                      | ± | SEM   |
| Food finding test                                                                               |                    |   |       |                        |   |       |                           |   |       |
| Lat of sniffing (s)                                                                             | 436.5              | ± | 50.8  | 967.3                  | ± | 212   | 919.4                     | ± | 102.5 |
| Lat of finding food (s)                                                                         | 516.9              | ± | 60.1  | 1349.5                 | ± | 305.6 | 973.7                     | ± | 103.3 |
| Lat of eating (s)                                                                               | 1423.5             | ± | 258.4 | 2106.5                 | ± | 295.2 | 2693.7                    | ± | 63.9  |
